# Supplementary material
Source: PubMed Central journal article supplement (PMC3319146)
Supplement: NIHMS62361-supplement-File0021.pdf [file NIHMS62361-supplement-File0021.pdf]

Probing Na<sup>+</sup> Induced Changes in the HIV-1 TAR  
Conformational Dynamics using NMR Residual Dipolar  
Couplings: New Insights into the Role of Counterions  
and Electrostatic Interactions in Adaptive Recognition

*Anette Casiano-Negroni, Xiaoyan Sun, and Hashim M. Al-Hashimi\**

**SUPPORTING INFORMATION**

Figure S1. Comparison of HSQC spectra for TAR in the presence and absence of phage in (A) 160 mM Na<sup>+</sup>, (B) 320 mM Na<sup>+</sup> and (C) 25 mM Na<sup>+</sup> / 4 mM Mg<sup>2+</sup>.

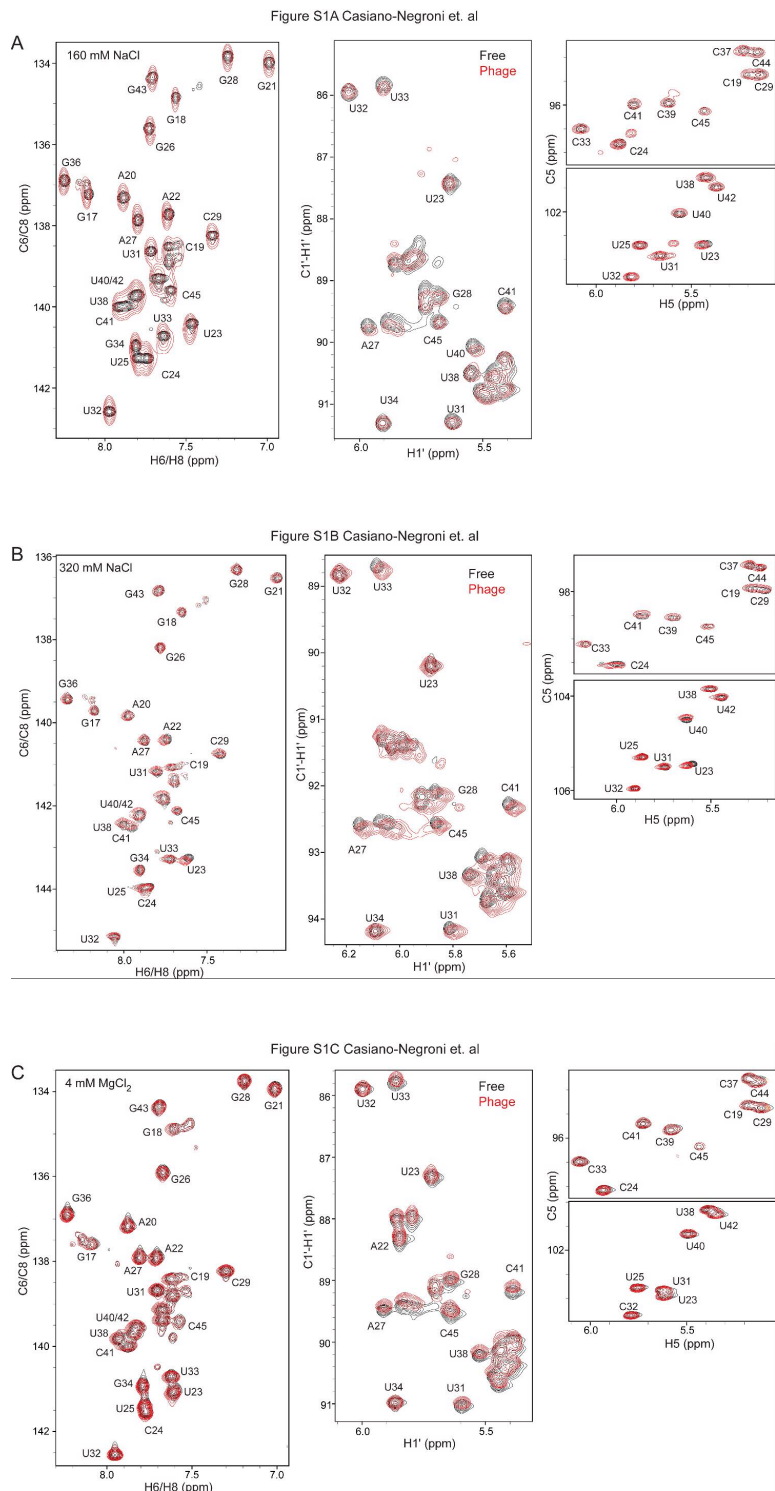

Figure S2. Correlation plot for one bond C-H RDCs measured in 25 mM Na<sup>+</sup> / 4 mM Mg<sup>2+</sup> TAR using experiments that yield splittings along the <sup>1</sup>H and <sup>13</sup>C and dimension.

Figure S2 Casiano-Negroni et al.

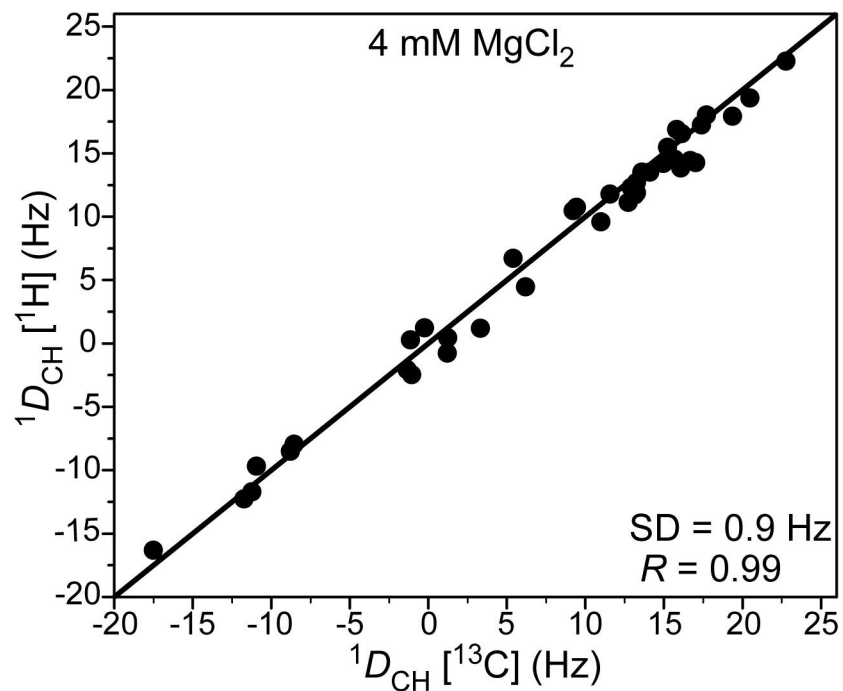

Figure S3. Comparison of one bond C-H RDCs (normalized for differences in degree of order, see legend of Figure 3) measured under different metal conditions.

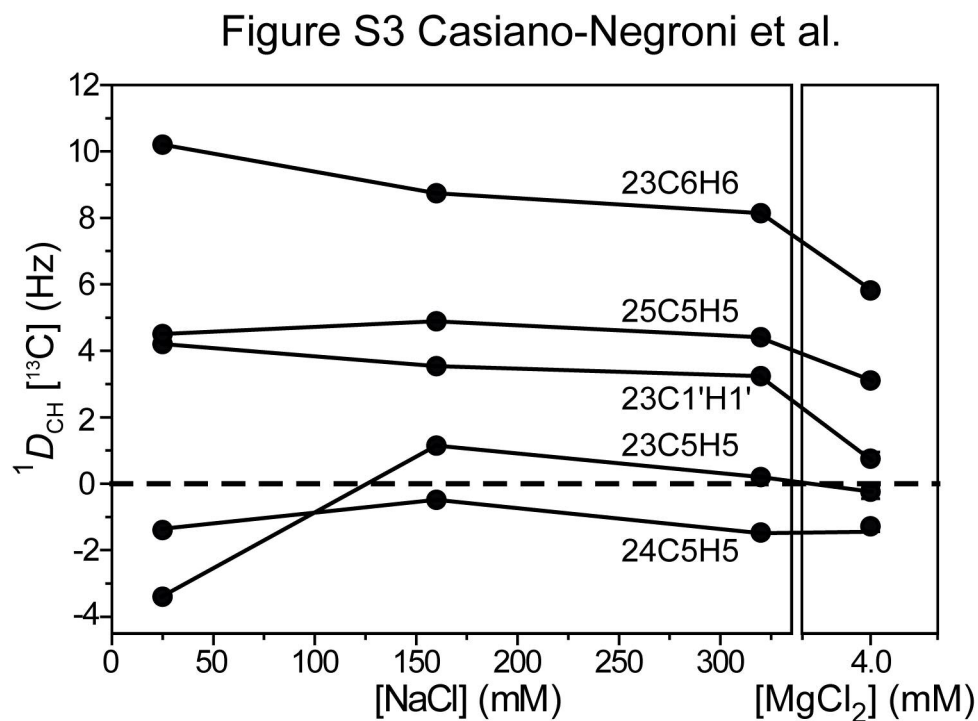

Figure S4. Electrostatic surfaces for the unbound and bound TAR structures (following removal of ligands) for all models of the NMR ensemble. Highlighted in letters are the positions of cationic groups on small molecules relative to the TAR electrostatic surface. The TAR orientation in each case was chosen to illustrate proximity of cationic groups near the strong negative charge potential in TAR. Only one NMR model was provided for structures Rbt 158, Rbt 203, and Rbt 550.

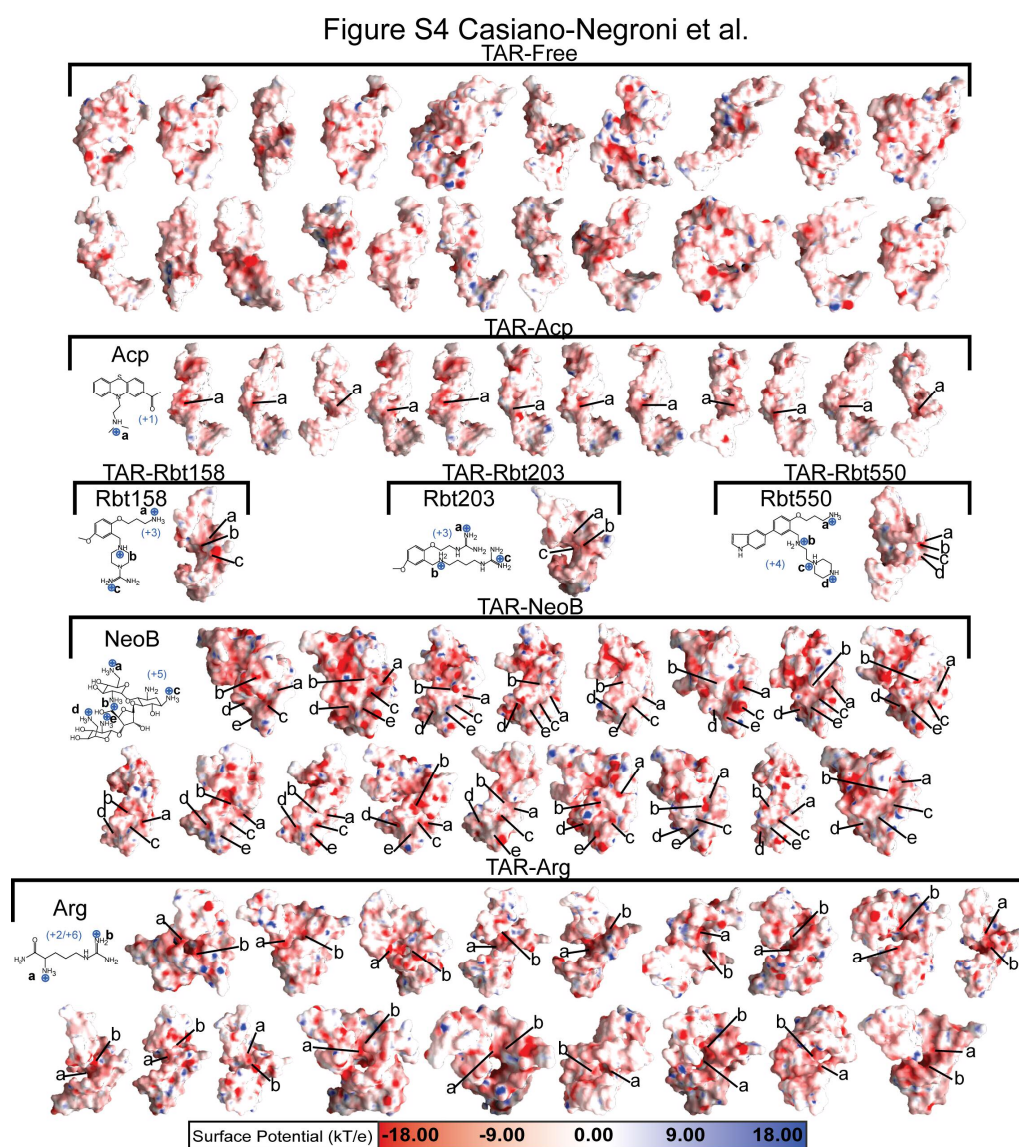

Figure S5. Simulations supporting the validity of Equation 2 for TAR under two-state averaging. Shown are the dynamically averaged  $\vartheta_{\text{int}}$  and  $\theta$  values as a function of the fractional population ( $p_{(\text{bound})}$ ) of a “bound” state for a two state model involving a “free” TAR conformation with  $\vartheta_{\text{int}} = 0.6$  and  $\theta = 51$  and a “bound” TAR conformation with  $\vartheta_{\text{int}} = 1.0$  and  $\theta = 0$ . The dashed line represents the population weighted average values of  $\vartheta_{\text{int}}$  and  $\theta$  obtained using Equation 2. The circles represent explicit  $\vartheta_{\text{int}}$  and  $\theta$  values obtained from motional averaging of the free and bound RDCs. The latter were computed as following. An alignment tensor was computed for the TAR conformation at 25 mM  $\text{Na}^+$  using the program PALES (1). The computed alignment tensor frame was used together with the TAR conformation to predict the “free” RDCs assuming an  $S_{zz}$  value of  $1.0 \times 10^{-3}$  and  $\eta = 0.2$ . The stem II RDCs were then uniformly scaled down by a factor of 0.6 to simulate  $\vartheta_{\text{int}} = 0.6$ . The “bound” RDCs were computed for a linear TAR conformation using an alignment tensor frame computed using PALES and  $S_{zz}$  value of  $1.0 \times 10^{-3}$  and  $\eta = 0.2$ . No scaling was performed to simulate  $\vartheta_{\text{int}} = 1.0$ . Population weighted average RDCs ( $p_{(\text{bound})}\text{RDC}_{(\text{bound})} + (1-p_{(\text{bound})})\text{RDC}_{(\text{free})}$ ) were then computed as a function of  $p_{(\text{bound})}$ . The RDCs measured in the two helices were then subjected to an order tensor analysis from which the dynamically averaged values of  $\vartheta_{\text{int}}$  and  $\theta$  were computed (solid line). Very good agreement is observed between the direct population weighted averaged  $\vartheta_{\text{int}}$  and  $\theta$  values (dashed line) and those obtained from averaging of the RDCs (solid line).

Figure S5 Casiano-Negroni et al.

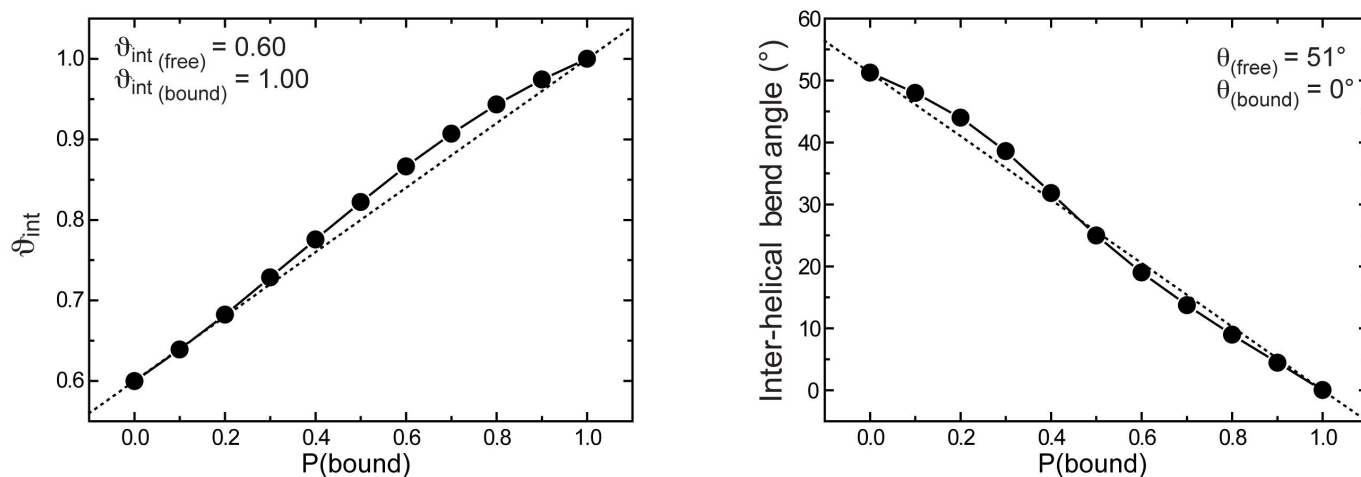



**Table S1.** One bond CH and NH RDCs (in Hz) measured in TAR under different metal conditions

| Residue<br>(bond vector) | 160mM NaCl | 320mM NaCl | 4mM MgCl <sub>2</sub> |
|--------------------------|------------|------------|-----------------------|
| 17(C8H8)                 | -4.5       | 0.2        | 0.2                   |
| 18(C1'H1')               | NA         | -29.5      | NA                    |
| 18(C8H8)                 | 0.3        | -1.6       | -1.8                  |
| 18(N1H1)                 | -7.3       | NA         | -2.8                  |
| 19(C6H6)                 | 9.6        | 10.0       | 8.4                   |
| 20(C1'H1')               | -6.6       | -19.5      | -26.4                 |
| 20(C8H8)                 | 12.2       | 16.4       | 13.6                  |
| 20(C2H2)                 | 7.9        | 4.4        | 6.1                   |
| 21(C1'H1')               | -6.6       | -13.0      | -19.9                 |
| 21(C8H8)                 | 15.6       | 20.8       | 18.6                  |
| 21(N1H1)                 | -6.2       | NA         | -8.5                  |
| 22(C8H8)                 | 11.7       | 17.2       | 16.4                  |
| 22(C2H2)                 | 4.9        | 13.6       | 17.9                  |
| 40(C1'H1')               | -5.7       | -8.7       | NA                    |
| 40(C5H5)                 | 14.2       | 14.7       | 11.6                  |
| 41(C6H6)                 | 11.8       | 15.2       | 12.6                  |
| 41(C5H5)                 | 11.1       | 11.2       | 13.8                  |
| 42(N3H3)                 | -5.6       | NA         | -7.8                  |
| 43(C1'H1')               | 14.6       | 7.4        | NA                    |
| 43(C8H8)                 | 13.0       | 15.5       | 11.9                  |
| 43(N1H1)                 | -4.3       | NA         | -2.7                  |
| 44(C6H6)                 | 1.3        | 1.2        | NA                    |
| 44(C5H5)                 | 12.0       | 17.2       | NA                    |
| 45(C1'H1')               | 2.9        | -1.1       | -16.9                 |
| 45(C6H6)                 | -5.0       | -4.3       | -6.9                  |
| 45(C5H5)                 | 9.9        | 11.3       | NA                    |
| 23(C1'H1')               | 3.4        | 3.3        | 0.6                   |



|            |       |       |       |
|------------|-------|-------|-------|
| 23(C6H6)   | 8.4   | 8.3   | 5.3   |
| 23(C5H5)   | -0.5  | 0.2   | 0.5   |
| 24(C5H5)   | 1.1   | -1.5  | -1.7  |
| 25(C5H5)   | 4.7   | 4.5   | 2.3   |
| 26(C1'H1') | -16.4 | -17.8 | 5.7   |
| 26(C8H8)   | 16.9  | 17.9  | 17.3  |
| 26(N1H1)   | -4.0  | NA    | -8.0  |
| 27(C1'H1') | -14.5 | -13.6 | -12.0 |
| 27(C8H8)   | 14.6  | 14.8  | 12.4  |
| 27(C2H2)   | 16.9  | 13.7  | 16.3  |
| 28(C1'H1') | -8.9  | -12.8 | -11.5 |
| 28(C8H8)   | 16.5  | 18.3  | 14.6  |
| 28(N1H1)   | NA    | NA    | -8.4  |
| 29(C6H6)   | 20.9  | 22.4  | 18.1  |
| 29(C5H5)   | 8.3   | 7.1   | 12.8  |
| 31(C1'H1') | -1.8  | -8.4  | -8.3  |
| 31(C6H6)   | 18.1  | 19.9  | 15.6  |
| 31(C5H5)   | 16.6  | 19.1  | 15.0  |
| 32(C1'H1') | 8.1   | 13.1  | 11.7  |
| 32(C6H6)   | 9.4   | 10.0  | 10.1  |
| 32(C5H5)   | 6.4   | 12.4  | 10.3  |
| 33(C1'H1') | -10.5 | -12.4 | -10.3 |
| 33(C6H6)   | 4.2   | 6.4   | 6.8   |
| 33(C5H5)   | 0.6   | 0.8   | 0.8   |
| 34(C1'H1') | 6.6   | 9.9   | 9.9   |
| 34(C8H8)   | 10.0  | 14.9  | 14.4  |
| 34(N1H1)   | -5.6  | NA    | -9.3  |
| 36(C8H8)   | 22.9  | 25.3  | 22.5  |
| 36(N1H1)   | -10.1 | NA    | -8.9  |
| 37(C5H5)   | 20.6  | 22.1  | 15.4  |
| 38(C1'H1') | NA    | NA    | -8.6  |
| 38(C6H6)   | NA    | 16.8  | 15.6  |

|          |      |      |      |
|----------|------|------|------|
| 38(C5H5) | 19.9 | 25.2 | 19.9 |
| 38(N3H3) | -6.5 | NA   | -6.5 |
| 39(C5H5) | 19.6 | 23.6 | 16.4 |

---

## REFERENCES.

- (1) Zweckstetter, M., and Bax, A. (2000) Prediction of sterically induced alignment in a dilute liquid crystalline phase; aid to protein structure determination by NMR. *J. Am. Chem. Soc.* 122, 3791-3792.
